# Supplementary material for: Construction of chain segment structure models, and effects on the initial stage of the thermal degradation of poly(vinyl chloride)
Source: Royal Society of Chemistry journal article supplement (doi:10.1039/c7ra07615k), 2017-01-01
Supplement: c7ra07615k1.pdf [file c7ra07615k1.pdf]

### Appendix Captions

**Fig.A.1** FT-IR spectra of PVC under different thermal pretreatment time (a-0d, b-1d, c-3d, d-5d, e-7d, f-8d, g-9d, h-10d)

**Fig.A.2** FT-IR spectra of PVC under different alkali treatment time (a-0h, b-1h, c-3h, d-5h, e-8h, f-10h, g-12h, h-13.5h)

**Table A.1** Number-Average and Weight-Average Molecular Weights and Polydispersities of PVC pretreated via the thermal and alkali method as a function of time

**Table A.1**

Number-Average and Weight-Average Molecular Weights and Polydispersities of PVC pretreated via the thermal and alkali method as a function of time

| Thermal pretreatment time (d) | Mn (g/mol) | Mw (g/mol) | PDI   | Alkali pretreatment time (h) | Mn (g/mol) | Mw (g/mol) | PDI   |
|-------------------------------|------------|------------|-------|------------------------------|------------|------------|-------|
| <i>a</i> -0d                  | 69238      | 110854     | 1.601 | <i>a</i> -0h                 | 69238      | 110854     | 1.601 |
| <i>b</i> -1d                  | 69415      | 100356     | 1.446 | <i>b</i> -1h                 | 76770      | 110268     | 1.436 |
| <i>c</i> -3d                  | 69530      | 100695     | 1.448 | <i>c</i> -3h                 | 70249      | 112299     | 1.598 |
| <i>d</i> -5d                  | 65454      | 98297      | 1.502 | <i>d</i> -5h                 | 70347      | 112129     | 1.594 |
| <i>e</i> -7d                  | 68632      | 104514     | 1.523 | <i>e</i> -8h                 | 77470      | 115814     | 1.495 |
| <i>f</i> -8d                  | 68456      | 103277     | 1.509 | <i>f</i> -10h                | 70932      | 111942     | 1.578 |
| <i>g</i> -9d                  | 68219      | 102908     | 1.508 | <i>g</i> -12h                | 74123      | 112964     | 1.524 |
| <i>h</i> -10d                 | 66998      | 102521     | 1.53  | <i>h</i> -13.5h              | 70362      | 110692     | 1.573 |

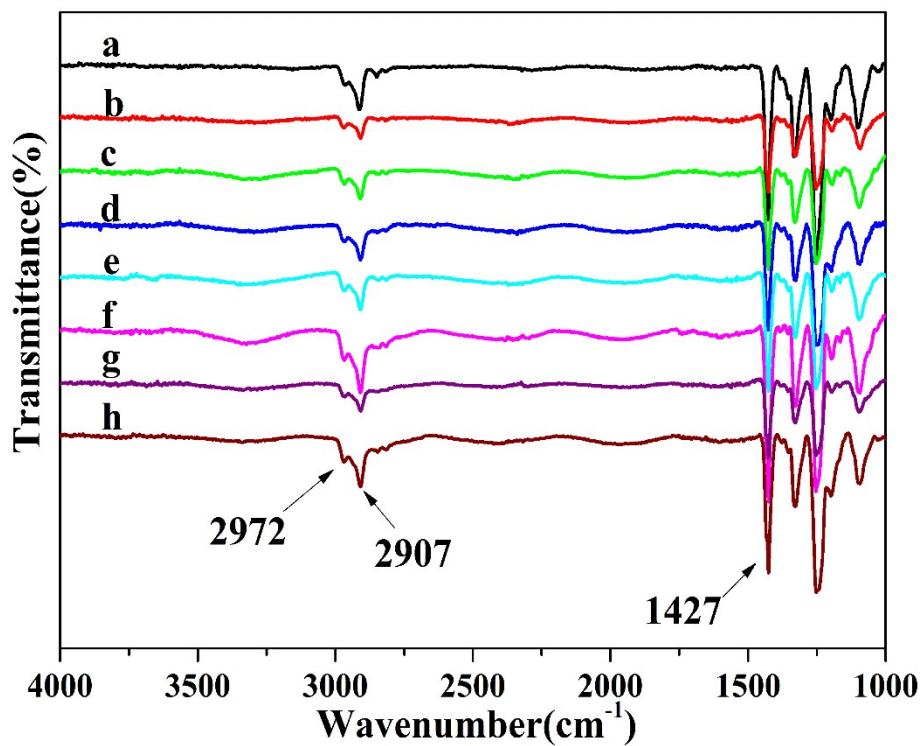

**Fig.A.1** FT-IR spectra of PVC under different thermal pretreatment time (a-0d, b-1d, c-3d, d-5d, e-7d, f-8d, g-9d, h-10d)

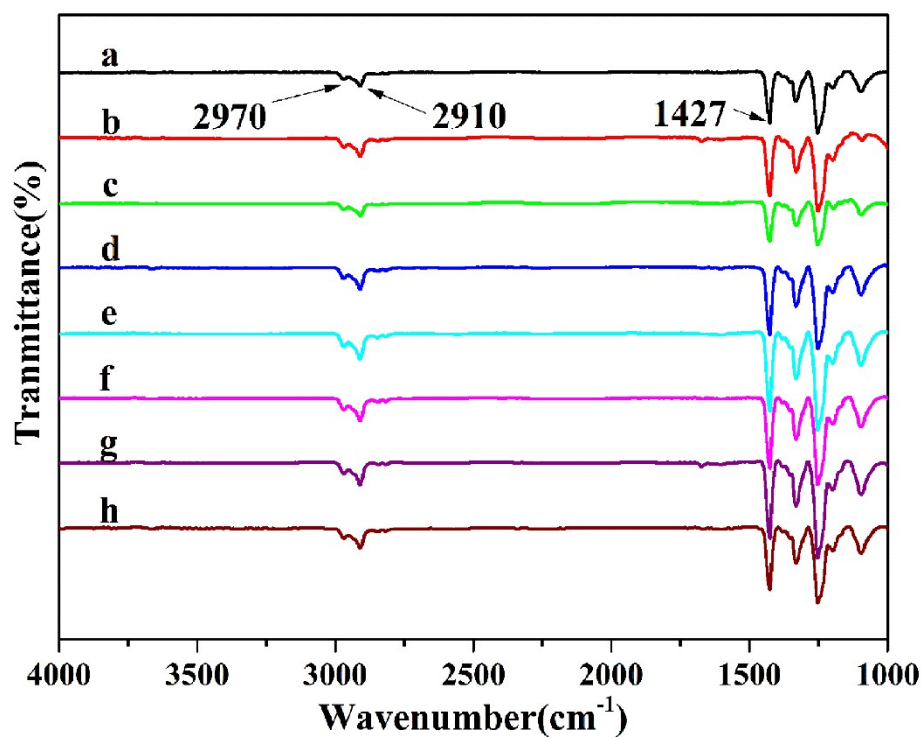

**Fig.A.2** FT-IR spectra of PVC under different alkali treatment time (a-0h, b-1h, c-3h, d-5h, e-8h, f-10h, g-12h, h-13.5h)
